# Supplementary material for: Synthesis and physical properties of triphenylamine-functionalized twistacenes: blue-emitting fluorophores
Source: Royal Society of Chemistry journal article supplement (doi:10.1039/c6ra28814f), 2017-01-01
Supplement: c6ra28814f1.pdf [file c6ra28814f1.pdf]

## Synthesis and Physical Property of Triphenylamine-Functionalized Twistacenes: Blue-Emitting Fluorophore

Jingdan Duan,<sup>a</sup> Huahang Pan,<sup>a</sup> Changting Wei,<sup>b</sup> Jinchong Xiao,<sup>a\*</sup> Guixia Zhai,<sup>a</sup>  
Wenming Su<sup>b\*</sup>

<sup>a</sup> College of Chemistry and Environmental Science, Key laboratory of Chemical Biology of Hebei Province, Hebei University, Baoding 071002, P. R. China

E-mail: [jcxiaoicas@163.com](mailto:jcxiaoicas@163.com)

<sup>b</sup> Printable Electronics Research Centre, Suzhou Institute of Nanotech and Nanobionics, Chinese Academy of Sciences, Suzhou 215123, P. R. China

E-mail: [wmsu2008@sinano.ac.cn](mailto:wmsu2008@sinano.ac.cn)

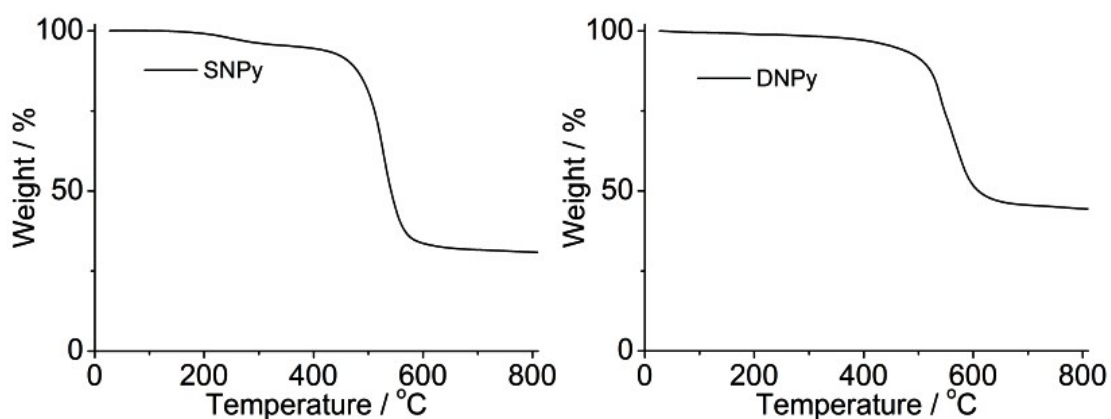

Figure S1 TGA curve of **SNPy** (a) and **DNP** (b).

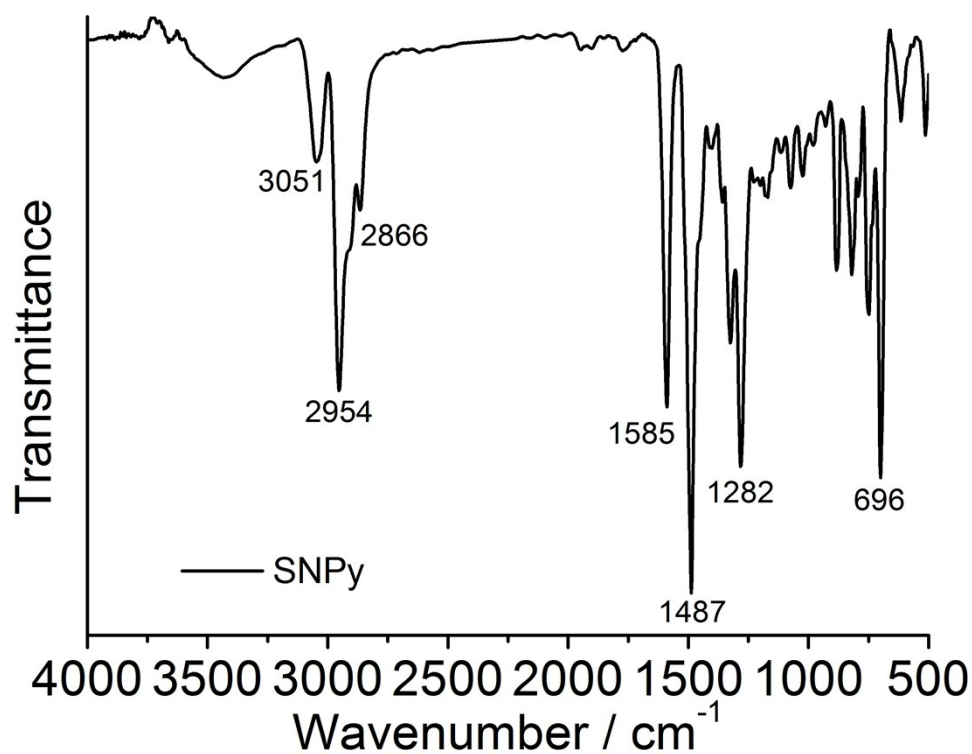

Figure S2 FT-IR spectrum of **SNPy**.

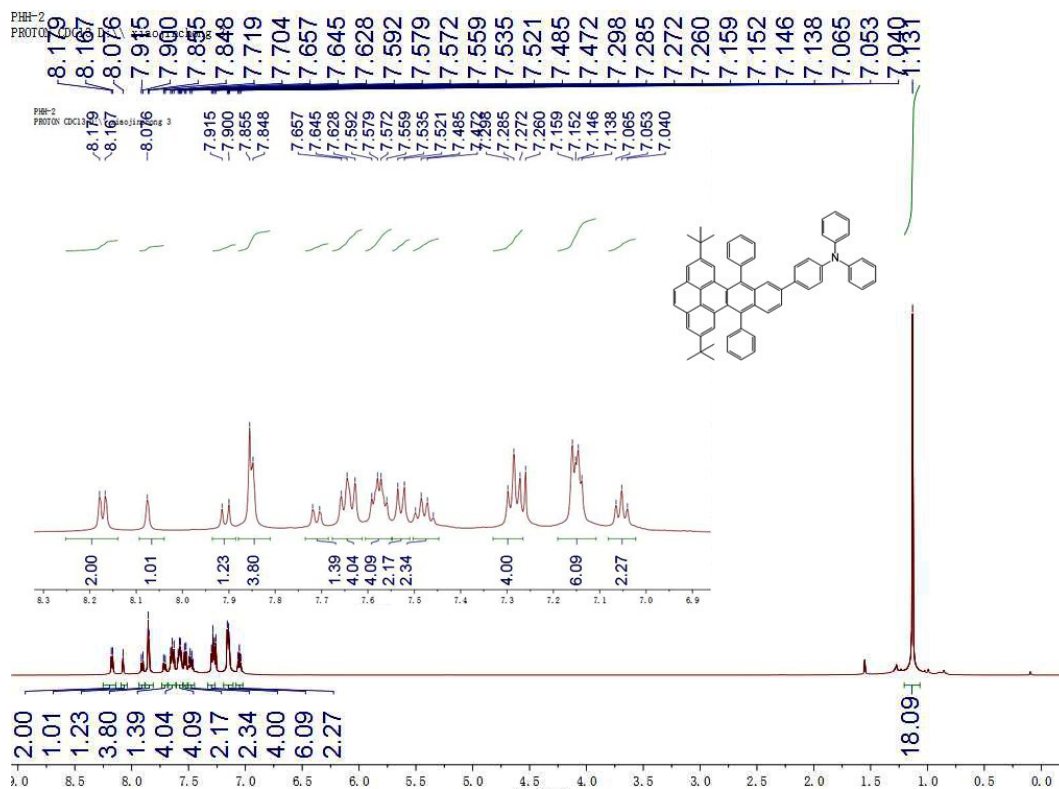

Figure S3  $^1\text{H}$  NMR spectrum of **SNPy**.

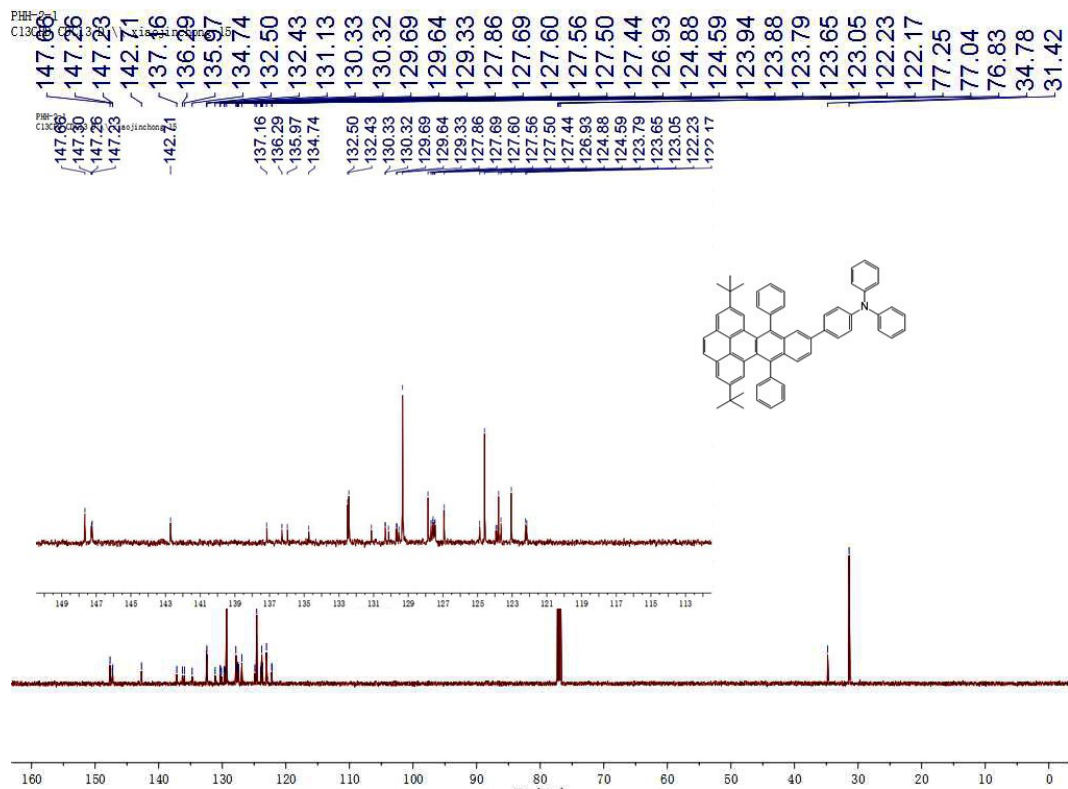

Figure S4  $^{13}\text{C}$  NMR spectrum of **SNPy**.

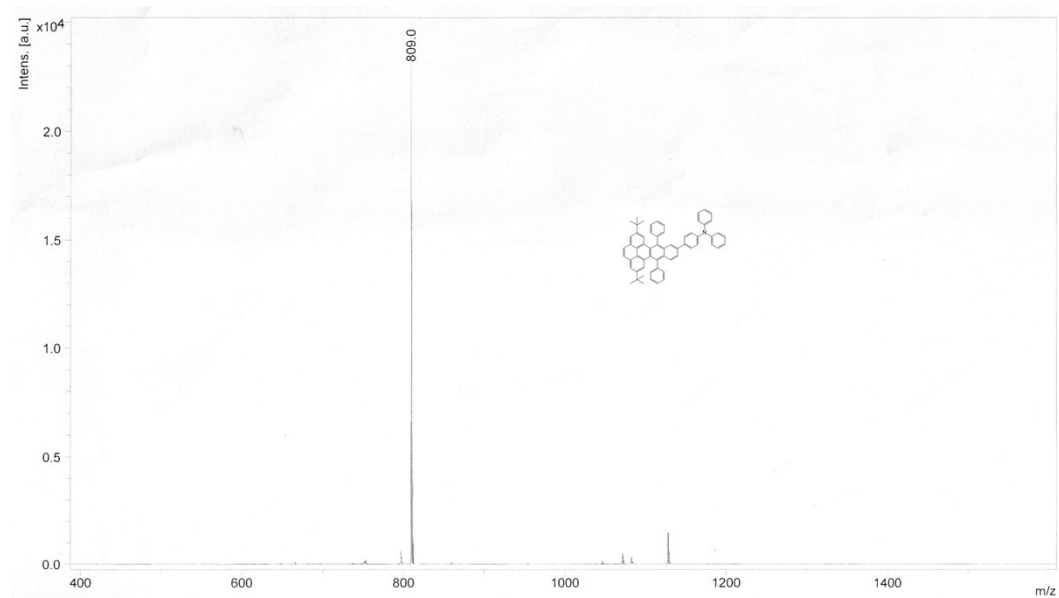

Figure S5 MALDI-TOF spectrum of **SNPy**.

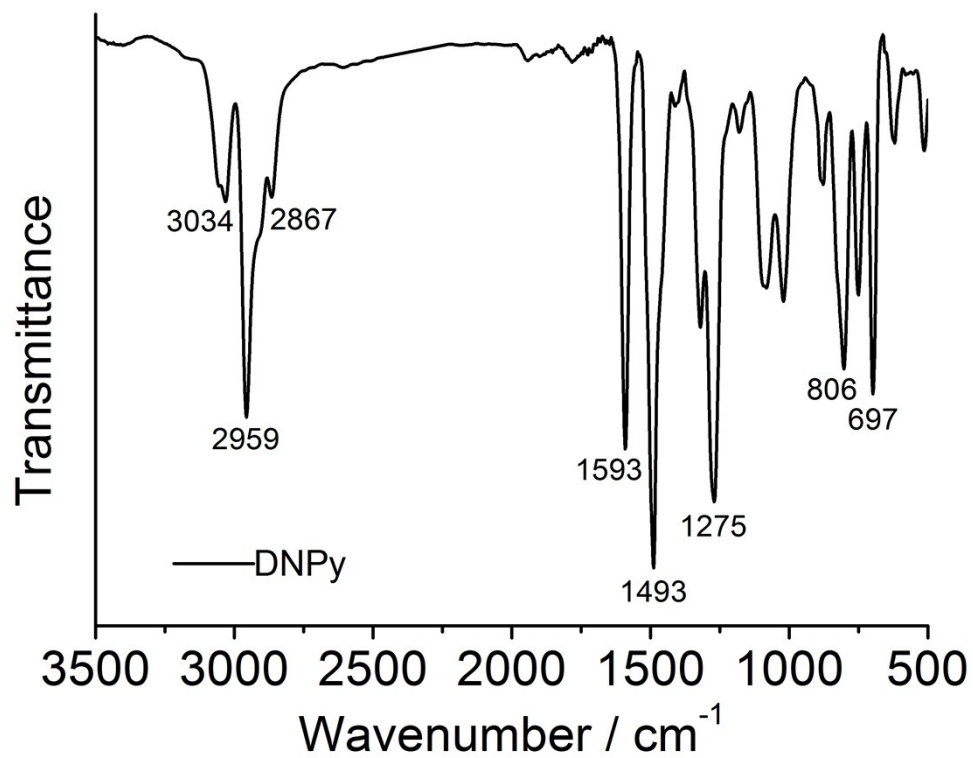

Figure S6 FT-IR spectrum of DNPpy.

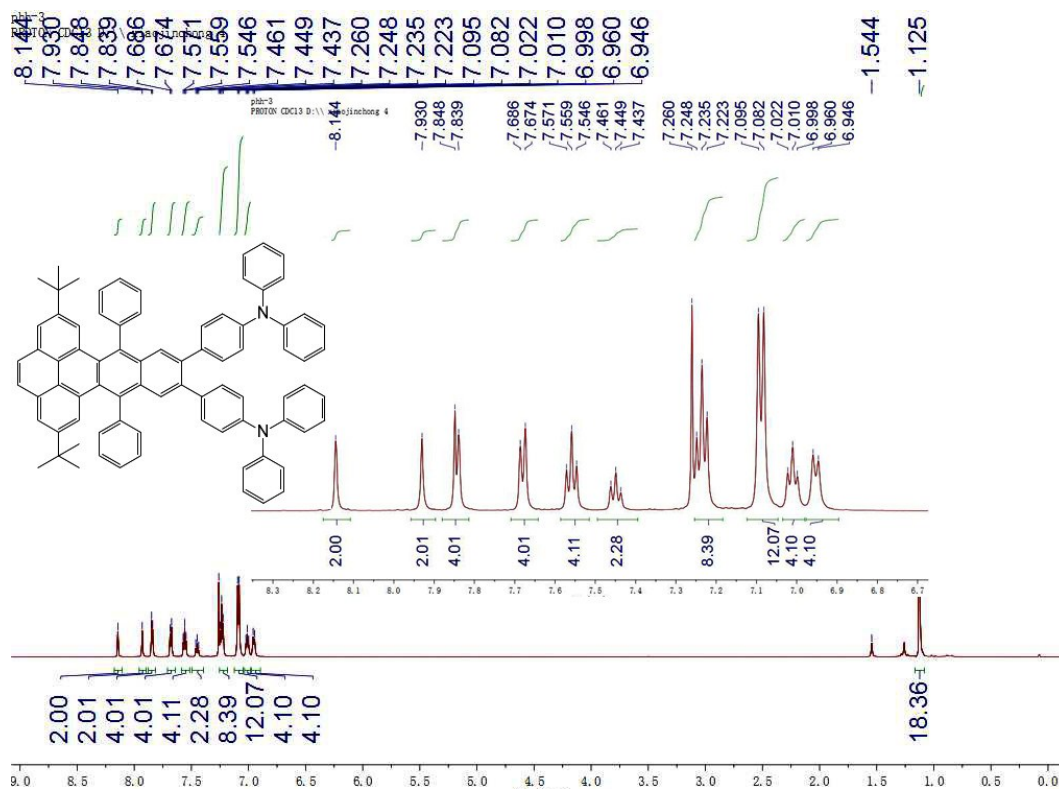

Figure S7  $^1\text{H}$  NMR spectrum of DNPpy.
